# Supplementary material
Source: Springer Nature journal article supplement (https://www.springermedizin.de/resource/supplementary/12943_2010_637_MOESM3_ESM.pdf/9554456)

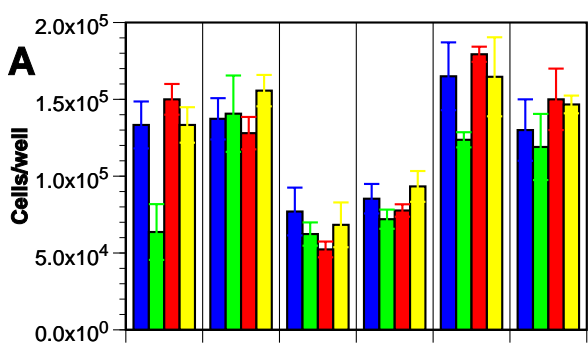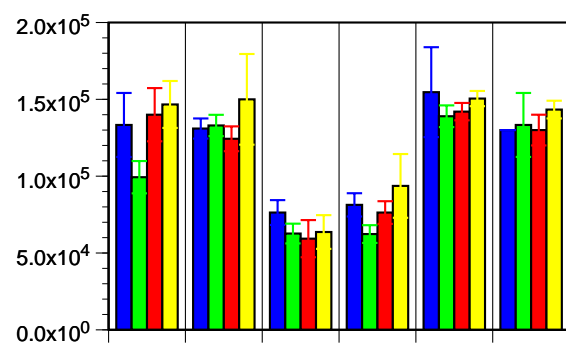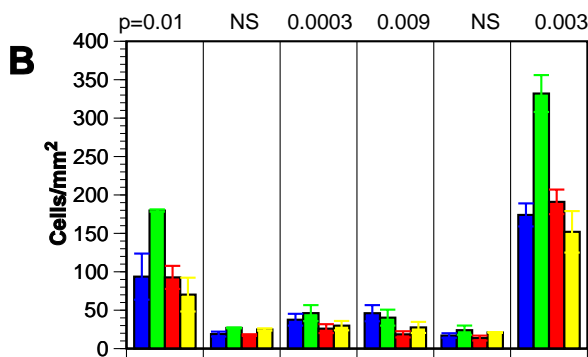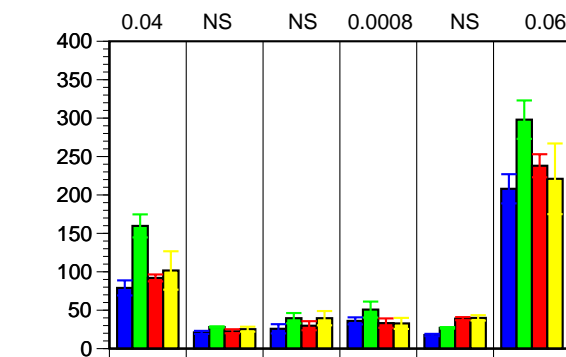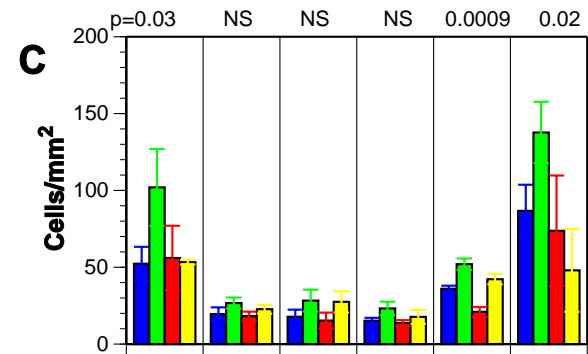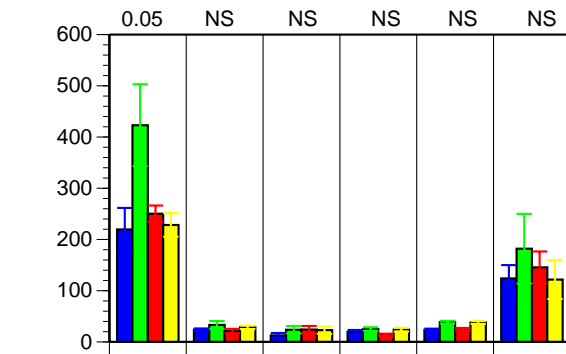

LY2109761

1D11

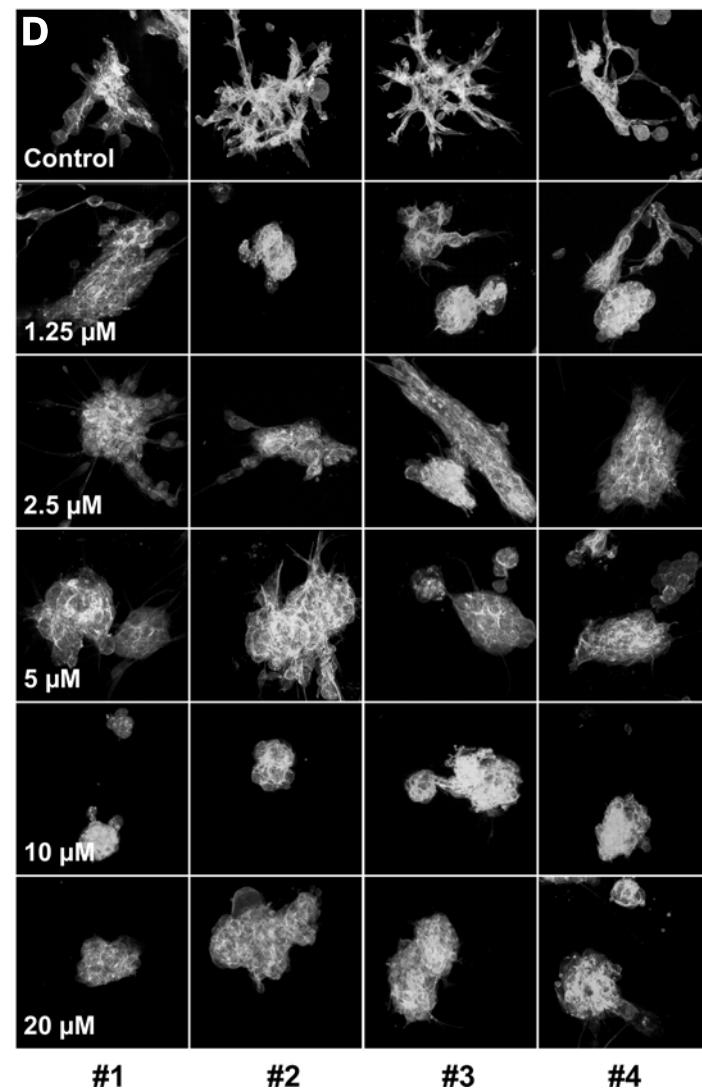

Supplement: MOESM3 [file 9554456]
